# Supplementary material
Source: HighWire-hosted journal article supplement (https://jnm.snmjournals.org/highwire/filestream/94921/field_highwire_adjunct_files/0/169987_Supplemental_Data.pdf)
Supplement: 169987_Supplemental_Data.pdf [file 169987_Supplemental_Data.pdf]

**Supplemental Table 1** Patient characteristics; median (IQR), range

|                       | All patients        | <sup>99m</sup> Tc-MAA | <sup>99m</sup> Tc-HSA | <i>P</i> * |
|-----------------------|---------------------|-----------------------|-----------------------|------------|
| n                     | 24                  | 12                    | 12                    | -          |
| Sex (m/f)             | 18/6                | 10/2                  | 8/4                   | 1.0        |
| Age (y)               | 64.6 (52.8/71.6)    | 66.1 (55.7/72.5)      | 58.6 (52.8/70.0)      | 0.46       |
|                       | 46.2-82.2           | 46.6-82.2             | 46.2-76.2             |            |
| Size (cm)             | 174 (170/178)       | 175 (172/178)         | 174 (169/179)         | 0.75       |
|                       | 160-86              | 167-184               | 160-186               |            |
| Weight (kg)           | 82 (66.8/88.5)      | 82 (75.0/88.5)        | 76 (65.5/86.5)        | 0.29       |
|                       | 49-110              | 59-110                | 49-93                 |            |
| BSA (m <sup>2</sup> ) | 1.98 (1.75/2.08)    | 1.98 (1.89/2.07)      | 1.91 (1.75/2.08)      | 0.36       |
|                       | 1.49-2.24           | 1.68-2.24             | 1.49-2.15             |            |
| LV (ml)               | 1,828 (1,425/2,386) | 1,815 (1,516/2,706)   | 1,893 (1,390/2,135)   | 0.76       |
|                       | 1,108-3,267         | 1,262 – 3,065         | 1,108 3,267           |            |
| TV (ml)               | 278.2 (137.8/727.6) | 193.6 (88.5/550.9)    | 384.9 (177.9/1,128)   | 0.22       |
|                       | 23.4-1894.0         | 23.4-1298.0           | 43.5-1894.0           |            |
| TL (%)                | 17.4 (8.2/32.8)     | 15.3 (5.7/27.4)       | 20.25 (10.3 /41.5)    | 0.25       |
|                       | 1.2-70.0            | 1.2-46.6              | 3.9-70.0              |            |
| LLS# (%)              | 3.7 (3.0/4.8)       | 3.9 (3.3 / 5.0)       | 3.2 (2.8/4.1)         | 0.26       |
|                       | 2.0-9.8             | 2.4-9.8               | 2.0-5.8               |            |

Data are median, interquartile range (25<sup>th</sup>-75<sup>th</sup> percentiles), and range.

\* Significance of differences between the two sub-groups; chi<sup>2</sup>-test for categorical variables and *t*-test (two-sided) for scalar variables

# LLS calculated from PS1 (1h p.i.).

BSA= Body Surface Area; LV = Liver Volume, TV = Tumor Volume, TL = Tumor Load, LLS = Liver Lung Shunt

**Supplemental Table 2.** Preparation and handling of particles;

|                                                           | <sup>99m</sup> Tc-MAA                             | <sup>99m</sup> Tc-HSA                        | <i>P</i> |
|-----------------------------------------------------------|---------------------------------------------------|----------------------------------------------|----------|
| Activity per preparation (MBq)                            | 3000 (3000 / 3000), 3000 - 3280                   | 1534 (1500 / 1552), 1400 - 1570              | < 0.0001 |
| Time between preparation and application (min)            | 87.0 (50.0 / 108.0), 22 – 143                     | 43.0 (25.5 / 68.5), 19 - 107                 | 0.065    |
| Applied activity (MBq) <sup>+</sup>                       | 127.8 (119.5 / 133.7), 90.4 - 144.8               | 139.9 (134.8 / 143.4), 125.4 - 149.4         | 0.014    |
| Residual syringe activity (MBq) (at application time)     | 42.6 (30.6 / 51.6), 15.4 - 72.7                   | 8.8 (6.6 / 20.0), 2.05 - 82.0                | 0.03     |
| Free <sup>99m</sup> Tc-pertechnetate at preparation (%) # | 0.015 (0.000 / 0.100), 0.0 - 0.5                  | 1.550 (0.775 / 3.275), 0.0 - 5.0             | 0.002    |
| Number of injected particles*                             | 189,200 (167,700 / 206,900),<br>135,700 - 315,300 | 39,160 (36,660 / 39,840),<br>21,970 - 42,430 | < 0.0001 |

Data are median, interquartile range (25<sup>th</sup>-75<sup>th</sup> percentiles), and range.

<sup>+</sup> corrected for residual activity in the syringe,

<sup>#</sup> estimated by thin layer chromatography.

\* The numbers of particles to be applied were calculated according to the product information sheet (8,9), assuming that  $4.5 \times 10^6$  particles MAA were labeled with 3 GBq <sup>99m</sup>Tc and  $4.0 \times 10^5$  particles HSA were labeled with 1.5 GBq <sup>99m</sup>Tc. The number of injected particles was calculated with respect to the amount of free <sup>99m</sup>Tc-pertechnetate.

**Supplemental Table 3.** Imaging time-points for PS

| Time-point (nominally)<br>(h) | Time p.i. (min)               |                               |                               |
|-------------------------------|-------------------------------|-------------------------------|-------------------------------|
|                               | All                           | <sup>99m</sup> Tc-MAA         | <sup>99m</sup> Tc-HSA         |
| 1                             | 60 (54.8/77.5)<br>32-120      | 60 (56.5/67.5)<br>35-100      | 58.5 (52.3/86.3)<br>32-120    |
| 5                             | 299 (288.8/314.8)<br>270-355  | 294 (283.8/301.2)<br>270-355  | 303 (293.8/320.5)<br>283-347  |
| 24                            | 1364 (1319/1419)<br>1070-1770 | 1370 (1319/1392)<br>1235-1770 | 1364 (1335/1425)<br>1070-1480 |

Data are median, interquartile range (25<sup>th</sup>-75<sup>th</sup> percentiles), and range.

**Supplemental Table 4.** Change in liver-lung shunt between PS scans; median (IQR), range

| <b>Time-point</b>                                   | <b><sup>99m</sup>Tc-MAA (%)</b>     | <b><sup>99m</sup>Tc-HSA (%)</b>  | <b><i>P</i>*</b> |
|-----------------------------------------------------|-------------------------------------|----------------------------------|------------------|
| <b>1<sup>st</sup> scan (1 h)</b>                    | 3.9 (3.3 / 5.0)<br>2.4–9.8          | 3.2 (2.8 / 4.1)<br>2.0–5.8       | 0.2              |
| <b>2<sup>nd</sup> scan from 1<sup>st</sup> scan</b> |                                     |                                  |                  |
| Absolute change                                     | 3.6 (2.8 / 4.5)<br>1.9–5.5          | -0.1 (-0.3 / 0.4)<br>-0.75–1.0   | < 0.0001         |
| Relative change                                     | 82.3 (67.0 / 112.8)<br>32.4–219.6   | -3.1 (-8.0 / 9.5)<br>-24.6–51.7  |                  |
| <b>3<sup>th</sup> scan from 1<sup>st</sup> scan</b> |                                     |                                  |                  |
| Absolute change                                     | 5.0 (4.4 / 8.2)<br>2.8–10.2         | 1.5 (0.3 / 2.4)<br>-1.4–3.6      | < 0.0001         |
| Relative change                                     | 127.3 (101.2 / 162.0)<br>46.6–376.4 | 41.6 (5.5 / 71.4)<br>-31.6–121.4 |                  |

\*p significance of difference in LLS estimated by <sup>99m</sup>Tc-MAA and <sup>99m</sup>Tc-HSA (tested by paired t-tests, two-sided)
